# Supplementary material
Source: Research Square preprint supplement (doi:10.21203/rs.3.rs-9033736/v1)
Supplement: Supplementary file 1 [file 1025249538f551e9d3c919bc.docx]

***Suppl. data:***

**Supplementary Table S1.** 16S rDNA sequences available in GenBank related to the species of the genus Phytoplasma were used for the phylogenetic analyses of phytoplasma 16S rDNA sequences identified in cassava plants with frogskin and oversprouting disease symptoms.

| **Species/Name** | **Strain** | **Sympthoms** | **Location** | **16S** | **Nº GenBank** |
| --- | --- | --- | --- | --- | --- |
| ‘*Candidatus* Phytoplasma mali’ | AP15 | Shoot proliferation | Italy | 16SrX-A | EF193366 |
| ‘*Ca*. Phytoplasma phoenicium’ | A4 | Witches'-broom | Lebanon | 16SrlX | AF515636 |
| Texas Phoenix palm phytoplasma | TPD | Lethal yellow | Texas | 16SrlV | AF434989 |
| Coconut lethal yellowing phytoplasma | LYF-C5 | Lethal yellow | Florida | 16SrlV-A | AF498308 |
| ‘*Ca*. Phytoplasma palmicola’ | 90-3-50 | Lethal Yellowing | Côte d’Ivoire | 16SrXXII-A | KY563222 |
| Potato purple top phytoplasma | AKpot6 | Purple top | Alaska | 16Srlll-N | GU004365 |
| Goldenrod yellows phytoplasma | GR1 | Goldenrod yellows | New York | 16Srlll-D | GU004372 |
| Potato purple top phytoplasma | Akpot7 | Purple top | Alaska | 16Srlll-F | GU004370 |
| Montana potato purple top phytoplasma | PPT-MT117-1 | Purple top | Montana | 16Srlll-M | FJ226074 |
| Pecan bunchy top phytoplasma | PBT | X-disease | Geórgia | 16Srlll-C | GU004371 |
| Blueberry stunt phytoplasma | BBS3 | Aster yellows | EUA | 16Srl-E | AY265213 |
| Aster yellows phytoplasma | CVB | Aster yellows | Germany | 16Srl-F | AY265212 |
| Grey dogwood stunt phytoplasma | GD1 | Aster yellows | Maryland | 16Srl-A | DQ112021 |
| ‘*Ca*. Phytoplasma americanum’ | PPT10-NE | Purple top | Texas | 16SrXIII-B | DQ174121 |
| Clover phyllody phytoplasma | KVG | Aster yellows | Germany | 16Srl-C | AY265218 |
| Cassava witches'-broom aster yellows phytoplasma | 06/03 | Aster yellows | Vietnam | 16Srl-C | KJ173677 |
| Plantago virescence phytoplasma | PVM | Aster yellows | Germany | 16Srl-A | AY265216 |
| Phormium yellow leaf phytoplasma | - | Yellow wave | New Zealand | 16SrXII-B | U43570 |
| Phytoplasma sp. STRAWB2 | STRAWB2 | Yellows | Florida | 16Srl-K | U96616 |
| Aster yellows phytoplasma | - | Aster yellows | Wallis | 16Srl-B | AY787139 |
| Primrose virescence phytoplasma | PRIVC | Aster yellows | Germany | 16Srl-B | AY265210 |
| Chrysanthemum yellows phytoplasma | CY | Yellows | Italy | 16Srl-B | EF634457 |
| Chrysanthemum yellows phytoplasma | CHRYM | Yellows | Germany | 16Srl-A | AY265214 |
| Aster yellows phytoplasma | IOWB | Aster yellows | USA | 16Srl-N | AY265205 |
| Aster yellows phytoplasma | PaWB | Aster yellows | USA | 16Srl-D | AY265206 |
| Aster yellows phytoplasma | AVUT | Aster yellows | Germany | 16Srl-M | AY265209 |
| Clover phyllody phytoplasma | CPh | Phyllody | Canada | 16Srl-C | AF222065 |
| ‘*Ca*. Phytoplasma solani’ | 2642BN | Yellows | Catalonia | 16SrXII-A | AJ964960 |
| Rubus stunt phytoplasma | RuS | yellows | USA | 16SrV-E | AY197648 |
| ‘*Ca*. Phytoplasma pyri’ | PD1 | Shoot proliferation | Baden Wuerttemberg | 16SrX-C | AJ542543 |
| ‘*Ca*. Phytoplasma prunorum’ | ESFY-G2 | Shoot proliferation | Baden Wuerttemberg | 16SrX-B | AJ542545 |
| Brinjal little leaf phytoplasma | BLL | Shoot proliferation | India | 16SrVI-D | EF186820 |
| Cyperus sp.' white leaf phytoplasma | Minab4 | white leaf | Iran | 16SrXI | MF136620 |
| ‘*Ca*. Phytoplasma ulmi’ | EY-626 | Yellows | USA | 16SrV-A | AY197657 |
| Jujube witches'-broom phytoplasma | JWB | Yellows | USA | 16SrV-B | AY197661 |
| ‘*Ca*. Phytoplasma fraxini’ | CfS-Br10 | Ash yellows | Brazil | 16SrVII-B | KR270802 |
| ‘*Ca*. Phytoplasma fraxini’ | AshY1 | Ash yellows | USA | 16SrVII-A | AF092209 |
| ‘*Ca*. Phytoplasma trifolii’ | CP | Shoot proliferation | Canada | 16SrV-C | AY500130 |
| Alder yellows phytoplasma’ | ALY | Yellows | China | 16SrV-C | AY197646 |
| ‘Ca. Phytoplasma vitis | FD-D | Yellows | USA | 16SrV-D | AY197644 |
| Alder yellows phytoplasma | ALY882 | Yellows | USA | 16SrV-C | AY197642 |
| Hemp dogbane yellows phytoplasma | HD1 | Yellows | USA | 16SrV-C | AY197654 |
| Sesame phyllody phytoplasma | SEPT | Phyllody | Thailand | 16Srll-A | GU004373 |
| Picris echioides' phyllody phytoplasma | - | Phyllody | Southern Italy | 16Srll-E | Y16393 |
| Sweet potato witches'-broom phytoplasma | - | witches' broom | USA | 16Srll-A | L33770 |
| Cassava witches'-broom phytoplasma | alp4 | witches' broom | USA | 16SrII | JQ957931 |
| Cassava witches'-broom phytoplasma | Ry2 | witches' broom | Thailand | 16Srll | LN897457 |
| Cassava witches'-broom phytoplasma | R16mR1 | witches' broom | Thailand | 16SrII | MW624432 |
| Cassava witches'-broom phytoplasma | T7-DN | witches' broom | Viet Nam | 16SrII | KM280679 |
| Cassava witches'-broom phytoplasma | T19-BRVT | witches' broom | Viet Nam | 16SrII | KM280682 |
| Crotalaria phyllody phytoplasma | CrP | phyllody | Thailand | 16Srll-C | EF193355 |
| Cassava witches'-broom phytoplasma | CWBUBB1 | witches' broom | Cambodia | 16SrII | MK942731 |
| Phytoplasma sp. | - | Big Bud | Australian | 16Srll-D | Y08173 1 |
| ‘*Ca*. Phytoplasma manihotii’ sp. nov. | CMF422 | Oversprouting | Laje-BA | 16SrIII-B | PX515205 |
| Cassava frogskin disease symptoms | CMF295 | Frogskin | Cruz das Almas-BA | 16SrIII-B | PX515201 |
| Cassava frogskin disease symptoms | CMF178 | Frogskin | Brazil | 16SrIII-L | KF019184.1 |
| ‘*Ca*. Phytoplasma manihotii’ sp. nov. | CMF419 | Oversprouting | Laje-BA | 16SrIII-B | PX515203 |
| ‘*Ca*. Phytoplasma manihotii’ sp. nov. | CMF421 | Oversprouting | Laje-BA | 16SrIII-B | PX515205 |
| Cassava frogskin disease symptoms | CMF292 | Frogskin | Cruz das Almas-BA | 16SrIII-B | PX515194 |
| Cassava frogskin disease symptoms | CMF291 | Frogskin | Cruz das Almas-BA | 16SrIII-B | PX515193 |
| - | CMF289 | Frogskin | Cruz das Almas-BA | 16SrIII-B | PX515192 |
| Manihot esculenta' phytoplasma | JC | Oversprouting | Japan | 16S | LC228770 |
| 'Manihot esculenta' witches'-broom phytoplasma | CaWB-Br01 | Oversprouting | Sao Paulo | 16Srlll-B | GU193976 |
| ‘*Ca*. Phytoplasma manihotii’ sp. nov. | CMF420 | Oversprouting | Laje-BA | 16SrIII-B | PX515204 |
| ‘*Ca*. Phytoplasma manihotii’ sp. nov. | CMF418 | Oversprouting | Laje-BA | 16SrIII-B | PX515202 |
| ‘*Ca*. Phytoplasma manihotii’ sp. nov. | CMF417 | Oversprouting | Laje-BA | 16SrIII-B | PX515201 |
| ‘*Ca*. Phytoplasma manihotii’ sp. nov. | CMF416 | Oversprouting | Laje-BA | 16SrIII-B | PX515200 |
| Cassava frogskin disease symptoms | CMF299 | Frogskin | Cruz das Almas-BA | 16SrIII-B | PX515199 |
| Cassava frogskin disease symptoms | CMF298 | Frogskin | Cruz das Almas-BA | 16SrIII-B | PX515198 |
| Cassava frogskin disease symptoms | CMF297 | Frogskin | Cruz das Almas-BA | 16SrIII-B | PX515197 |
| Cassava frogskin disease symptoms | CMF293 | Frogskin | Cruz das Almas-BA | 16SrIII-B | PX515195 |
| Cassava frogskin disease symptoms | CMF296 | Frogskin | Cruz das Almas-BA | 16SrIII-B | PX515196 |
| ‘*Ca*. Phytoplasma manihotii’ sp. nov. | OVSP L01 | Oversprouting | Salitre-CE | 16SrIII-B | PX515191 |
| ‘*Ca*. Phytoplasma manihotii’ sp. nov. | OVSP S01 | Oversprouting | Salitre-CE | 16SrIII-B | PX515190 |
| Walnut witches'-broom phytoplasma | WWB | witches' broom | USA | 16Srlll-G | AF190227 |
| Poinsettia branch-inducing phytoplasma | PoiBI | X-disease | USA | 16Srlll-H | AF190223 |
| Spiraea stunt phytoplasma | SP1 | stunt | USA | 16Srlll-E | AF190228 |
| Cassava frogskin disease phytoplasma | CFSD_Br1 | frogskin | Brazil | 16Srlll-A | KF667079 |
| Canadian peach X phytoplasma | - | - | Canada | 16Srlll-A | L33733 |
| Loofah witches'-broom mycoplasma-like | LfWB | Lwitches'-broom | Germany | 16Srlll-A | L33764 |
| ‘*Ca*. Phytoplasma luffae’ | Loofah | witches'-broom | USA | 16SrVIII | AF248956 |
| ‘*Ca*. Phytoplasma luffae’ | CWB17b | witches'-broom | Philippines | CWB17b | MN784934 |

**Supplementary Table S2.** DNA sequence of *secY* genes available at NCBI/GenBank representing species of the genus Phytoplasma.

| **Isolate** | **Strain** | **Associated Disease** | **Location** | **16S** | **Nº GenBank** |
| --- | --- | --- | --- | --- | --- |
| Alder yellows phytoplasma | ALY | Elm yellows | Italy | 16SrV-C | AY197684 |
| ‘*Candidatus* Phytoplasma vitis’ | FD-D | Elm yellows | Italy | 16SrV-D | AY197685 |
| ‘*Ca*. Phytoplasma vitis’ | FD70 | Elm yellows | França | 16SrV-C | AY197686 |
| ‘*Ca*. Phytoplasma vitis’ | FD-C | Elm yellows | Italy | 16SrV-C | AY197688 |
| ‘Ca. Phytoplasma spartii’ | SpaWB 229 | Elm yellows | Italy | 16SrV-C | AY197689 |
| Alder yellows phytoplasma | ALY882 | Elm yellows | Germany | 16SrV-C | AY197692 |
| Rubus stunt phytoplasma | RuS | Elm yellows | Italy | 16SrV-E | AY197696 |
| Hemp dogbane yellows phytoplasma | HD1 | Elm yellows | EUA | 16SrV-C | AY197687 |
| ‘*Ca*. Phytoplasma ulmi’ | EY1 | Elm yellows | New York | 16SrV-A | GU004330 |
| ‘*Ca*. Phytoplasma ulmi’ | EY1 | Elm yellows | EUA | 16SrV-A | AY197690 |
| ‘*Ca*. Phytoplasma ulmi’ | EY-626 | Elm yellows | Italy | 16SrV-A | AY197691 |
| Cherry lethal yellows phytoplasma | CLY-5 | Elm yellows | China | 16SrV-B | AY197693 |
| Peach yellows phytoplasma | PY-Entrada | Elm yellows | Italy | 16SrV-B | AY197694 |
| Jujube witches'-broom phytoplasma | JWB | Elm yellows | China | 16SrV-B | AY197695 |
| ‘*Ca*. Phytoplasma fraxini’ | AshY | Ash yellows | New York | 16SrVI-A | GU004329 |
| Dry bean phyllody phytoplasma | DBPh2 | Dry bean phyllody | Washington | 16SrVI-A | GU004352 |
| Dry bean phyllody phytoplasma | DBPh3 | Dry bean phyllody | Washington | 16SrVI-A | GU004353 |
| Vinca virescence phytoplasma | VR | vinca virescence | California | 16SrVI-A | GU004317 |
| Lucerne virescence phytoplasma | LUM | vinca virescence | França | 16SrVI-A | GU004318 |
| Brinjal little leaf phytoplasma | BLL | small eggplant leaves | Índia | 16SrVI-D | GU004356 |
| ‘*Ca*. Phytoplasma trifolii’ | CP | trifolii | Canada | 16SrVI-A | GU004315 |
| Potato purple top phytoplasma | AKpot1 | clover proliferation | Alaska | 16SrVI-A | GU004351 |
| Potato witches'-broom phytoplasma | PWB | potato witch's broom PWB | Canada | 16SrVI-A | GU004316 |
| Potato purple top phytoplasma | AKpot4 | purple potato top | Alaska | 16SrVI-A | GU004343 |
| Potato purple top phytoplasma | AKpot2 | Potato purple top | Alaska | 16SrVI-A | GU004342 |
| Potato purple top phytoplasma | AKpot5 | Potato purple top | Alaska | 16SrVI-A | GU004344 |
| ‘*Ca*. Phytoplasma luffae’ | LfWB | Loofah witches'-broom | Taiwan | 16SrVIII-A | GU004319 |
| Coconut lethal yellowing phytoplasma | LYF | Coconut lethal yellows | Florida | 16SrIV-A | GU004320 |
| Cactus witches'-broom phytoplasma | CaWBYN16 | Cactus witches'-broom | China | 16SrlI-C | GU004323 |
| Soybean phyllody phytoplasma | SOYP | Soybean phyllody | Thailand | 16SrlI-C | GU004324 |
| Crotalaria phyllody phytoplasma | CrP | Crotalaria phyllody | USA | 16SrlI-C | GU004349 |
| Cotton phyllody phytoplasma | CoP | Cotton phyllody | USA | 16SrlI-C | GU004350 |
| 'Picris echioides' phytoplasma | PEP | 'Picris echioides' | USA | 16Srll-E | GU004348 |
| Peanut witches'-broom phytoplasma | L15 | Peanut witches'-broom | Taiwan | 16Srll-A | GU004331 |
| Sweet potato witches'-broom phytoplasma | SPWB | Sweet potato witches'-broom | Taiwan | 16Srll-A | GU004321 |
| Australian tomato big bud phytoplasma | TBB | Australian tomato big bud | Australia | 16SrlI-D | GU004347 |
| Sesame phyllody phytoplasma | SEPT | Sesame phyllody | Thailand | 16SrlI-A | GU004322 |
| Sesame phyllody phytoplasma | SEPN | Sesame phyllody | Thailand | 16SrlI-A | GU004362 |
| ‘*Ca*. phytoplasma manihotii’ sp. nov. | OVSP-L01 | Oversprouting | Brazil | 16SrIII-B | PV883012 |
| ‘*Ca*. phytoplasma manihotii’ sp. nov. | OVSP-S01 | Oversprouting | Brazil | 16SrIII-B | PV883013 |
| *'Manihot esculenta'* phytoplasma | JC | infecting cassava | Japan | 16SrIII | LC228771 |
| Peach X-disease phytoplasma | CX | Peach X-disease | Canada | 16SrllI-A | GU004327 |
| Western X phytoplasma | WX | Western X disease | Canada | 16SrllI-A | GU004354 |
| Poinsettia branch-inducing phytoplasma | JR1Ph | Poinsettia branch-inducing | USA | 16SrlI-H | GU004328 |
| Walnut witches'-broom phytoplasma | WWB | Walnut witches'-broom | Georgia | 16SrlII-G | GU004325 |
| Spirea stunt phytoplasma | SP1 | Spirea stunt | New York | 16SrilI-E | GU004326 |
| Clover yellow edge phytoplasma | CYE | Clover yellow edge | Lithuania | 16SrllI-B | GU004332 |
| Pecan bunchy top phytoplasma PBT | PBT | Pecan bunchy top | Georgia | 16SrllI-C | GU004361 |
| Milkweed yellows phytoplasma | MW1 | Milkweed yellows | New York | 16Srlll-F | GU004340 |
| Potato purple top phytoplasma | MT117 | Potato purple top | Montana | 16SrlII-M | GU004333 |
| Potato purple top phytoplasma | AKpot7 | Potato purple top | Alaska | 16Srill-F | GU004358 |
| Goldenrod yellows phytoplasma | GR1 | Goldenrod yellows | New York | 16Srill-D | GU004364. 1 |
| Potato purple top phytoplasma | AKpot6 | Potato purple top | Alaska | 16SrlII-N | GU004359 |
| Vaccinium witches' broom phytoplasma | Vac | Witches' broom | Germany | 16SrllI-F | GU004360 |
| Plum leptonecrosis phytoplasma | PLN | Plum leptonecrosis | Italy | 16SrX-B | GU004334 |
| ‘*Ca*. Phytoplasma pyri’ | PD1 | Apple proliferation | Italy | 16SrX-C | GU004363 |
| ‘*Ca*. Phytoplasma mali’ | AP15 | Apple proliferation | Germany | 16SrX-A | GU004335 |
| ‘*Ca*. Phytoplasma solani’ | PO | Stolbur | França | 16SrXII-A | FM163376 |
| Stolbur-Rus phytoplasma | Rus93 | Stolbur | Russia | 16SrXII-A | GU004346 |
| Stolbur-It phytoplasma | PTV | Stolbur | Italy | 16SrXII-A | GU004355 |
| American potato purple top wilt phytoplasma | APPTW10NE | potato purple top | Nebraska | 16SrXIII-Е | GU004338 |
| ‘*Ca*. Phytoplasma hispanicum | MPV | periwinkle virescence | Mexico | 16SrXII | GU004336 |
| Blueberry stunt phytoplasma | BBS3 | Blueberry stunt | Michigan | 16Srl-E | GU004357 |
| Aster yellows phytoplasma | PRVIC | Aster yellows | USA | 16Srl-B | AY803176 |
| Aster yellows phytoplasma | AY1 | Aster yellows | USA | 16Srl-B | AY803177 |
| Aster yellows phytoplasma | HyPH | Aster yellows | USA | 16Srl-B | AY803173 |
| Chrysanthemum yellows phytoplasma | CY | Chrysanthemum yellows | Italy | 16Srl-B | DQ787851 |
| Aster yellows phytoplasma | AV2192 | Aster yellows | USA | 16Srl-B | AY803167 |
| Aster yellows phytoplasma | AVUT | Aster yellows | USA | 16Srl-M | AY803168 |
| Aster yellows phytoplasma | MBS | Aster yellows | USA | 16Srl-B | AY803175 |
| Maize bushy stunt phytoplasma | MBS | Aster yellows | Mexico | 16Srl-B | GU004341 |
| Aster yellows phytoplasma | PaWB | Aster yellows | USA | 16Srl-D | AY803184 |
| Paulownia witches'-broom phytoplasma | PaWB | Aster yellows | Taiwan | 16Srl-D | GU004337 |
| Aster yellows phytoplasma | IOWB | Aster yellows | USA | 16SrI-N | AY803182 |
| Aster yellows phytoplasma | KVE | Aster yellows | USA | 16Srl-C | AY803174 |
| Aster yellows phytoplasma | CPh | Aster yellows | USA | 16Srl-C | AY803179 |
| Aster yellows phytoplasma | KVG | Aster yellows | USA | 16Srl-C | AY803183 |
| Clover phyllody phytoplasma | CPh-a | Aster yellows | Canada | 16Srl-C | GU004339 |
| Aster yellows phytoplasma | GD1 | Aster yellows | USA | 16Srl-A | AY803171 |
| Aster yellows phytoplasma | BBS-3 | Aster yellows | USA | 16SrI-E | AY803169 |
| Aster yellows phytoplasma | STRAWB2 | Aster yellows | USA | 16SrI-K | AY803180 |
| Aster yellows phytoplasma | ACLR-AY | Aster yellows | USA | 16Srl-F | AY803166 |
| Aster yellows phytoplasma | CVB | Aster yellows | USA | 16Srl-F | AY803172 |
| New Jersey aster yellows phytoplasma | NJAY | Aster yellows | USA | 16Srl-A | GU004345 |
| Aster yellows phytoplasma | BB | Aster yellows | USA | 16Srl-A | AY803178 |
| Plantago virescence phytoplasma | PVM | Plantago virescence | Germany | 16Srl-A | AY265216 |
| Aster yellows phytoplasma | CHRYM | Aster yellows | USA | 16Srl-A | AY803170 |
| Aster yellows phytoplasma | HYDP | Aster yellows | USA | 16Srl-A | AY803181 |
| Aster yellows phytoplasma | PVM | Aster yellows | USA | 16Srl-A | AY803185 |

**
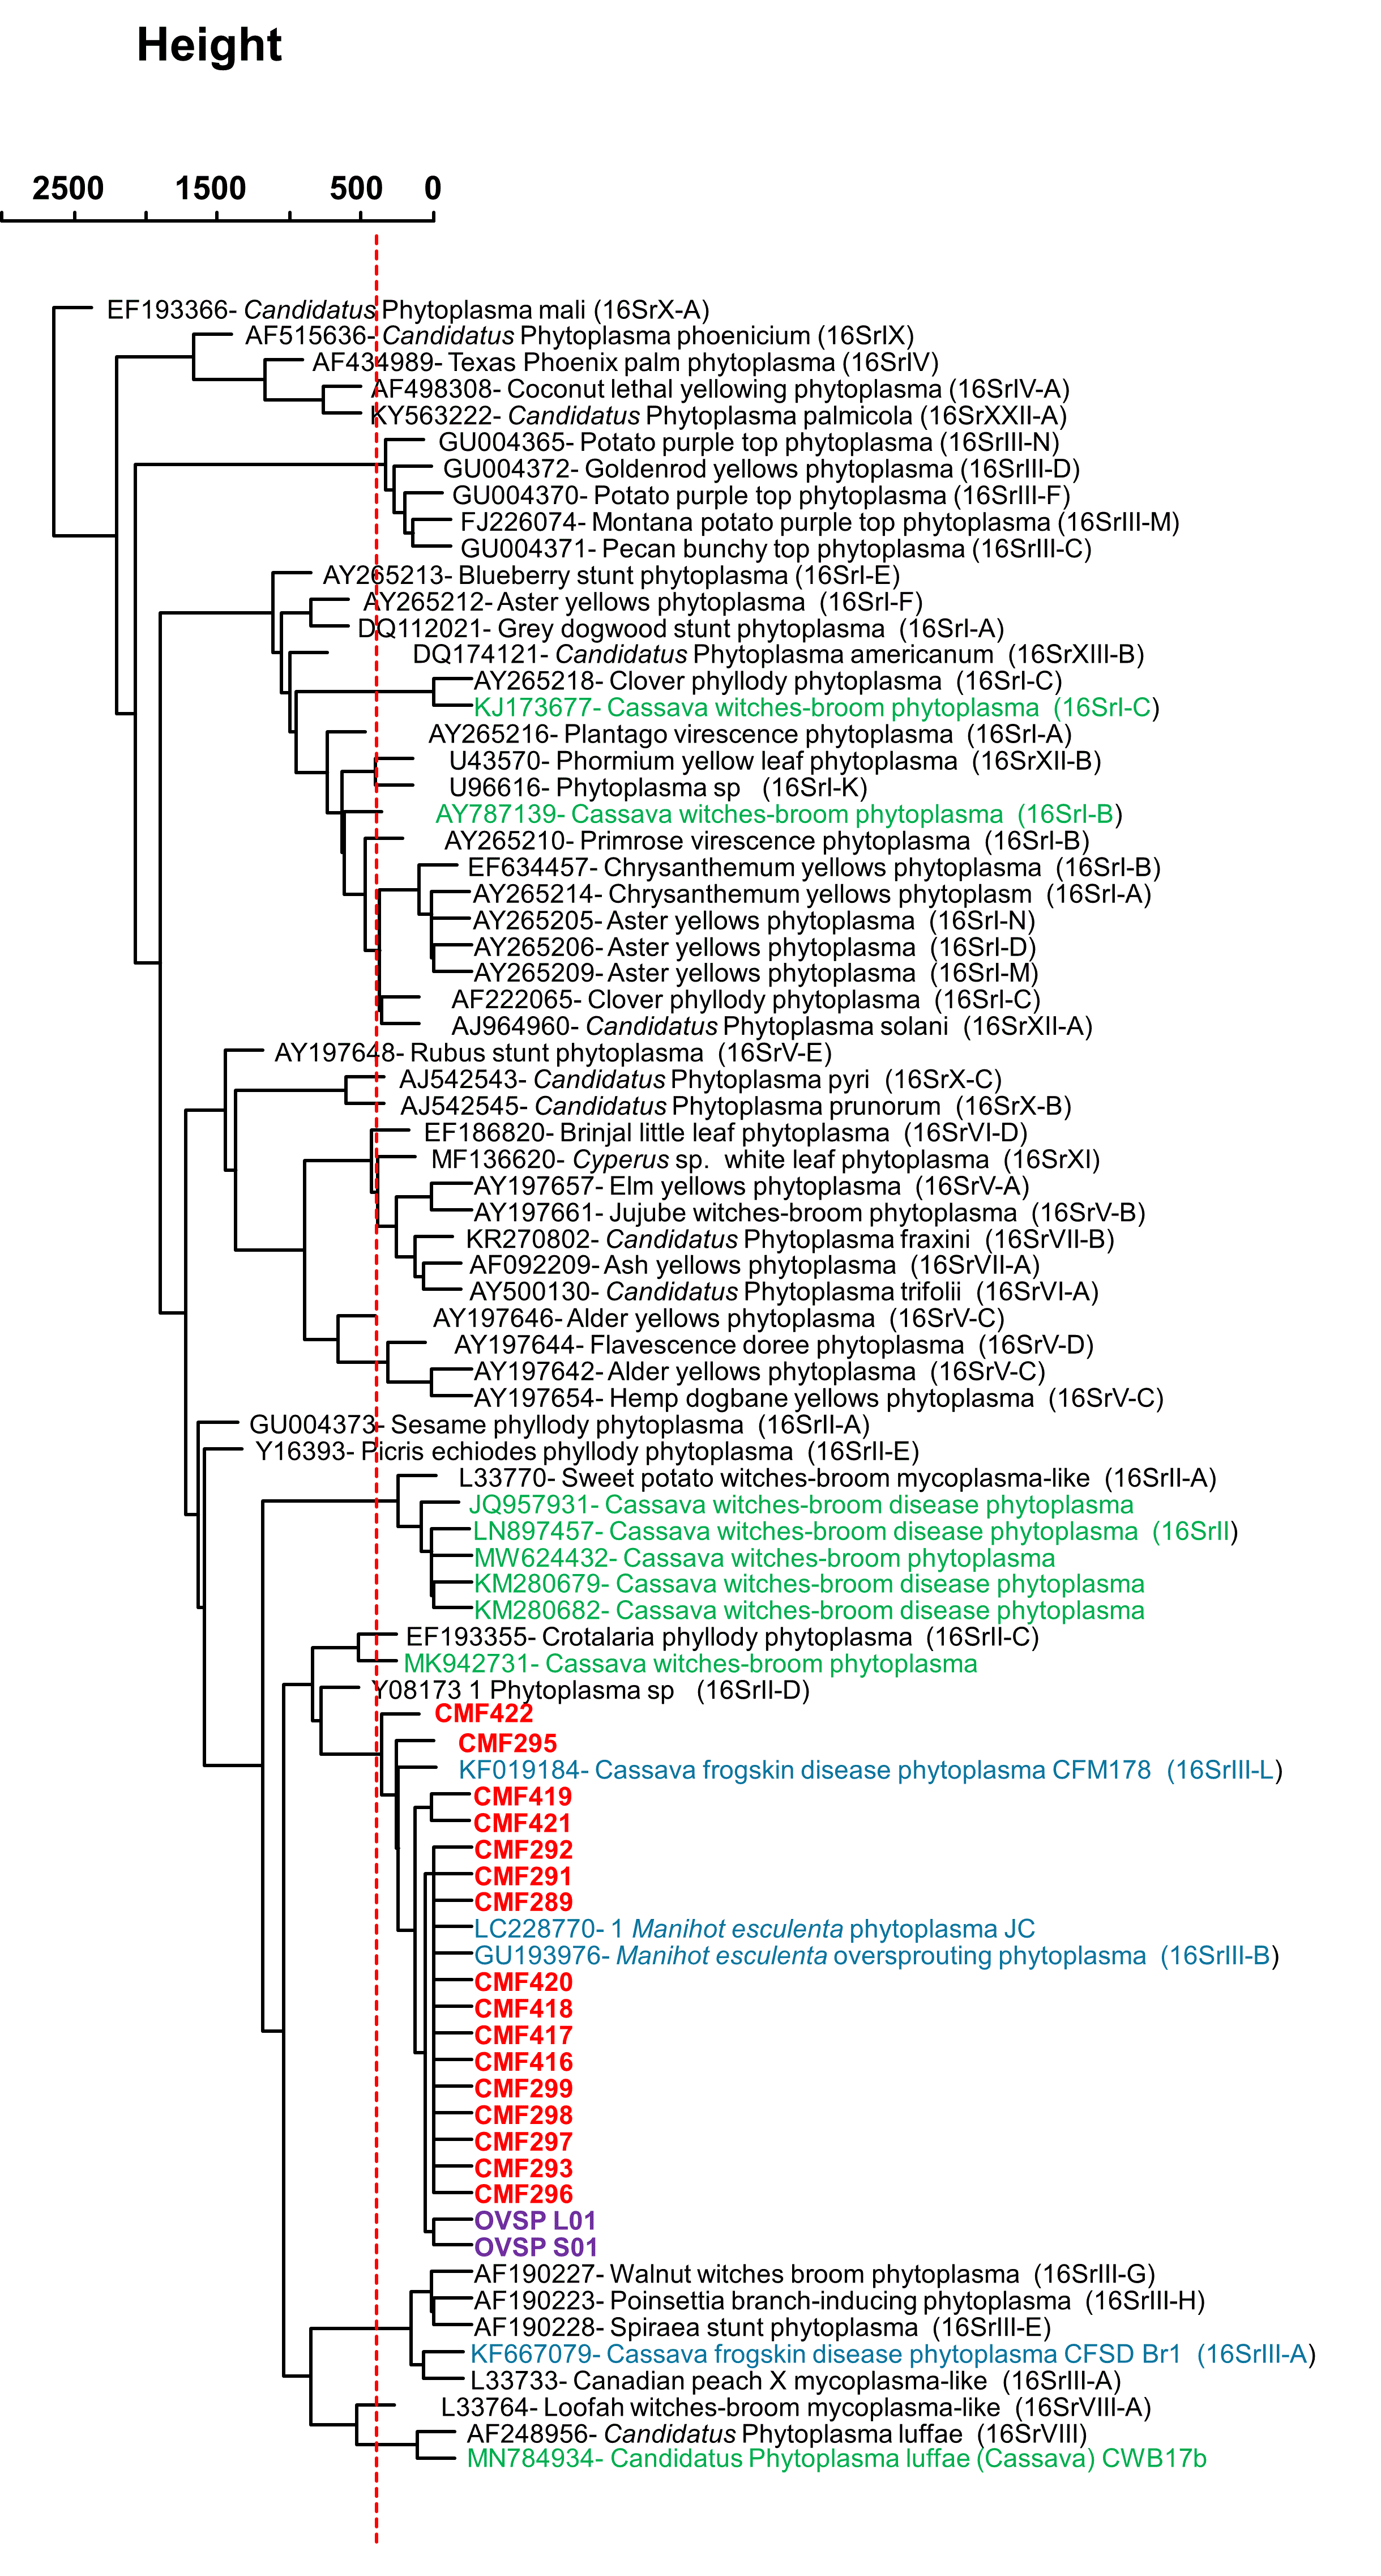
**

**Supplementary Fig. S1.** Dendrogram based on the 16S rRNA gene, constructed using the UPGMA (Unweighted Pair Group Method with Arithmetic Mean) clustering method. The analysis was performed on the PCR-RFLP F2nR2 region of the 16S rRNA gene, generated through *in silico* digestion using 17 restriction enzymes. Red lines whose the threshold limit for the dissimilarities.

**
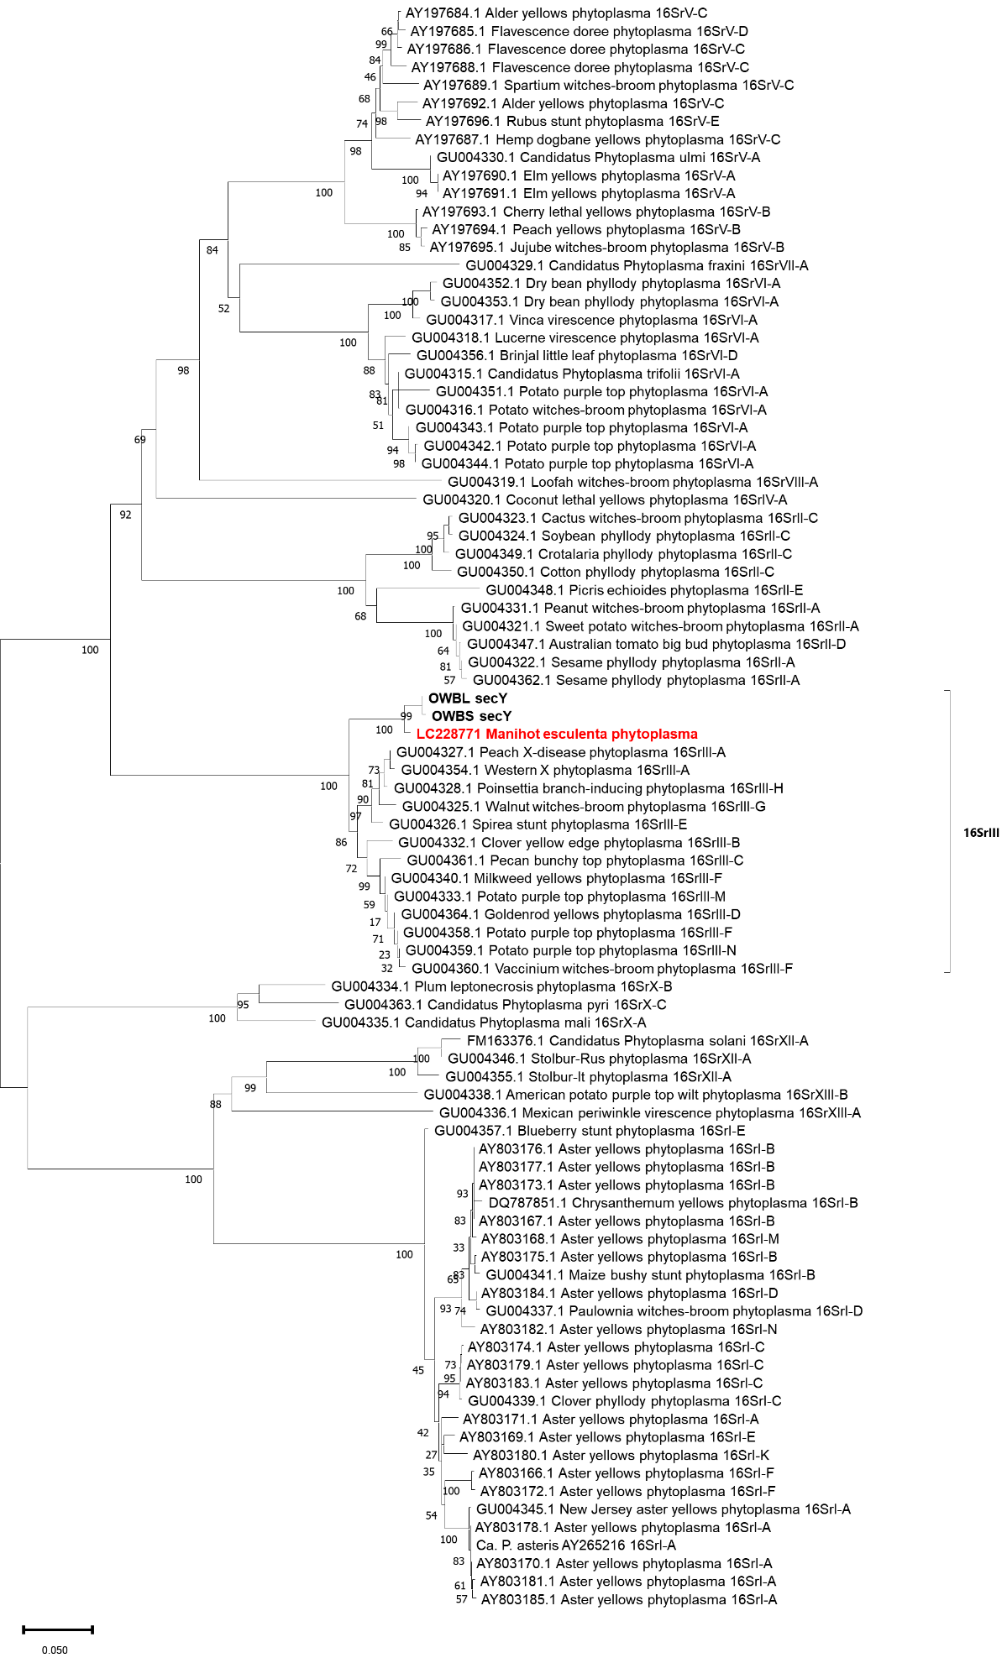
**

**Supplementary Fig. S2.** Unrooted phylogenetic tree inferred from *secY* gene sequences (1,333 nucleotides) using the Maximum Likelihood method under the T92+G model. The dataset comprised sequences retrieved from NCBI. Bootstrap values (1,000 replicates) are shown next to the branches, and branch lengths (substitutions per site) are indicated by the scale bar at the bottom of the figure. Cassava oversprouting phytoplasma isolates (OVSP-S01 and OVSP-L01) are highlighted in bold.

**
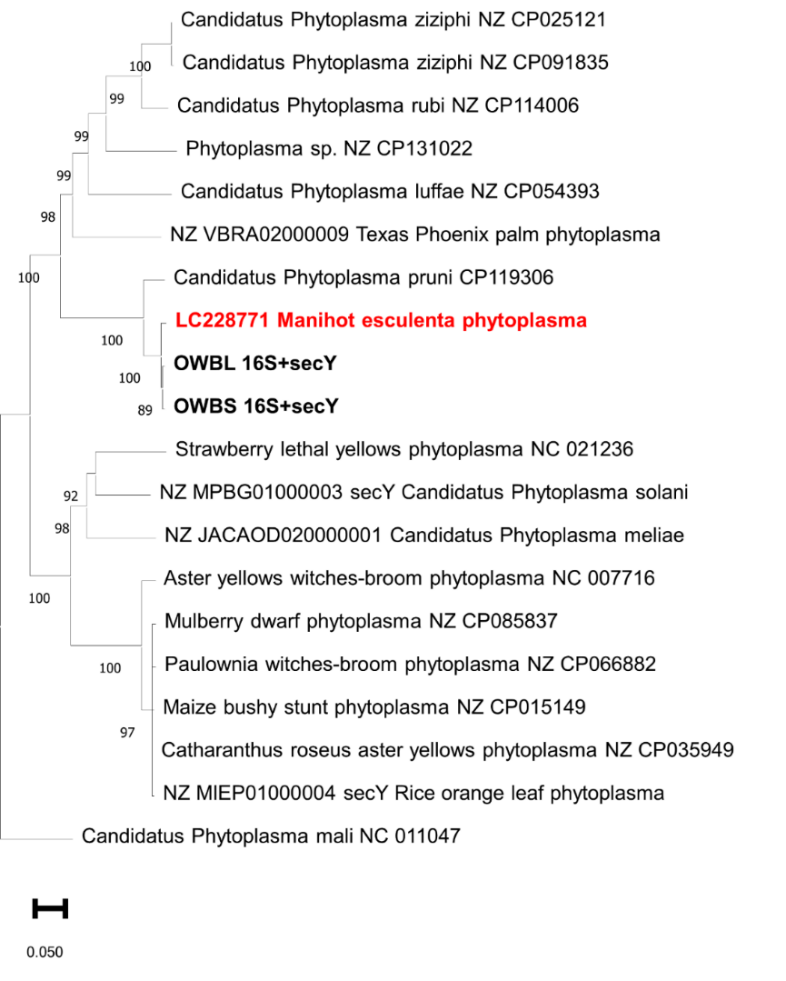
**

**Supplementary Fig. S3.** Phylogenetic tree inferred from Multi-Locus Sequence Analysis (MLSA) of the concatenated alignment of 16S rRNA (1,515 nucleotides; GTR+G model) and *secY* (1,333 nucleotides; T92+G model) gene sequences using the Maximum Likelihood method. The dataset comprised representative phytoplasma sequences retrieved from NCBI, with *‘Candidatus* Phytoplasma mali’ included as the outgroup. Bootstrap values (1,000 replicates) are shown next to the branches, and branch lengths (substitutions per site) are indicated by the scale bar at the bottom of the figure. Cassava oversprouting phytoplasma isolates (OVSP-S01 and OVSP-L01) are highlighted in bold. The phytoplasma previously described in cassava in Japan is highlighted in bold red (Koinuma et al., 2018).


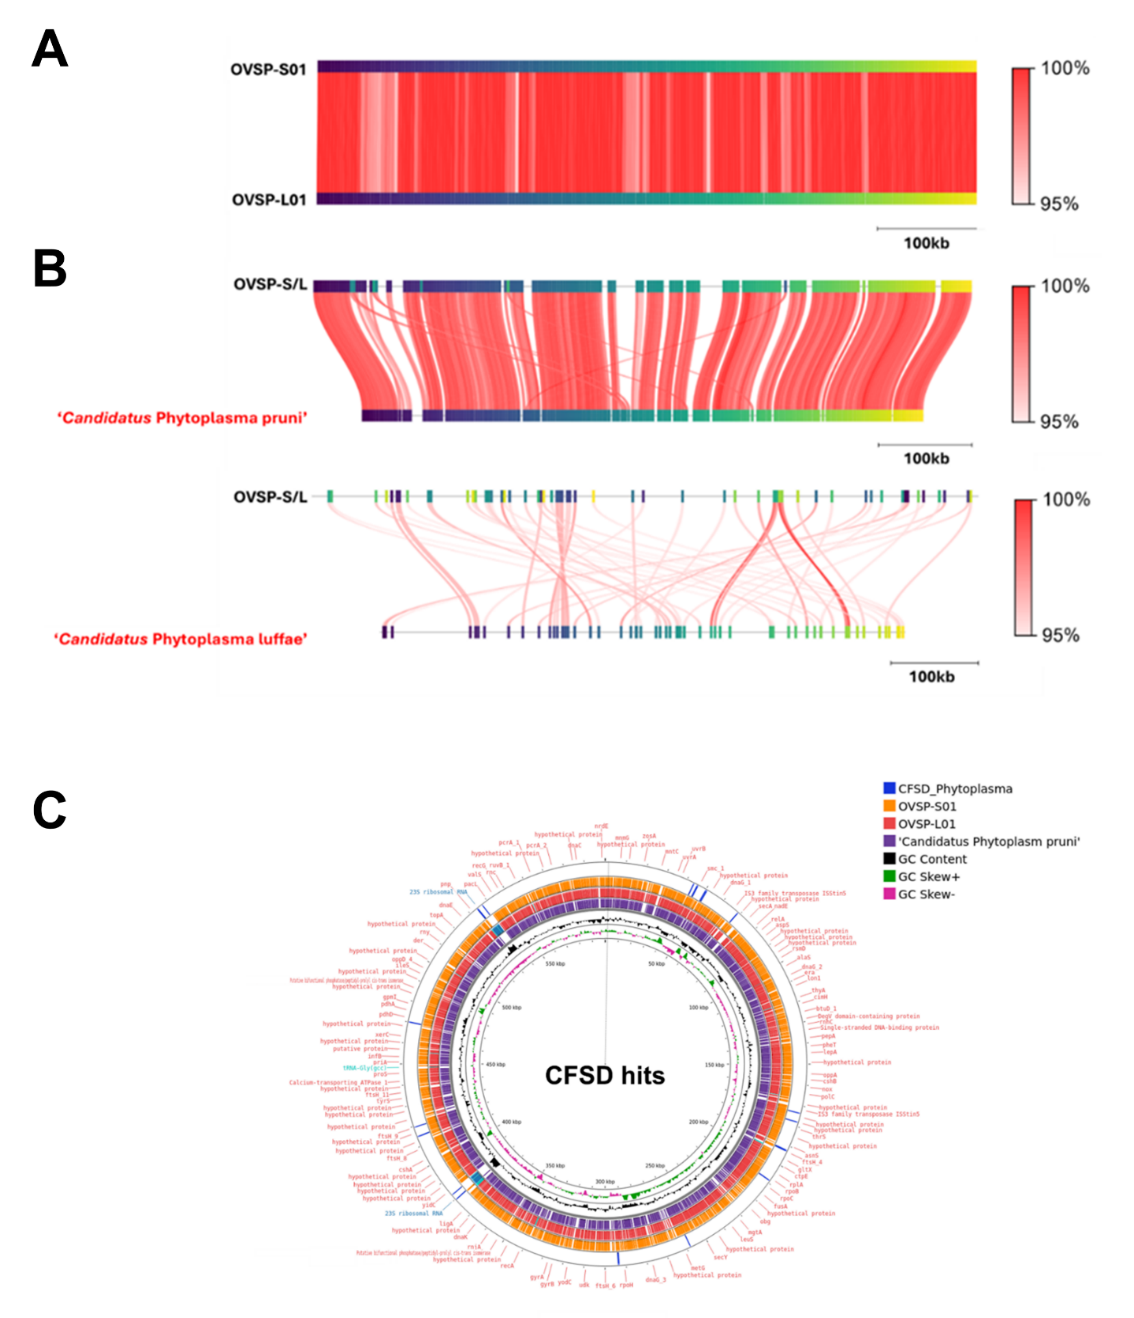


**Supplementary Fig. S4.** Pairwise genome sequence comparisons illustrating the order and orientation of *‘Candidatus* Phytoplasma manihotii’ sp. nov. (A) Contigs of *‘Ca.* Phytoplasma manihotii*’* sp. nov. aligned with the complete genome sequence of *‘Candidatus* Phytoplasma pruni’ (GCA_013391955), with an ANI score of 92.44%. (B) Contigs of *‘Ca.* Phytoplasma manihotii’ sp. nov. was aligned against the complete genome sequence of *‘Candidatus* Phytoplasma luffae*’* (GCA_0180224475), with an ANI score of 83.76%. Colored connecting lines indicate homologous genomic regions between the compared sequences, with shading intensity proportional to the nucleotide identity. The scale bar on the right represents the pairwise identity, ranging from 95% to 100%. Circular genomic representation of for an expected genome from the “frogskin disease phytoplasma” (CFSD_Phytoplasma) if it is real (outside circle in blue). Coding sequences (CDSs), rRNA genes, and tRNA genes were identified using PROKSEE on the CGView Server with Prokka annotation, displayed on the outermost circle. The inner ring corresponds to the genomic representation of *‘Candidatus Phytoplasma pruni’* (purple), followed by the genome representations of OVSP-L01 (red) and OVSP-S01 (orange), assigned to *‘Candidatus* Phytoplasma manihotii’ sp. nov. The inner rings depict GC content (black) and GC skew, with positive values in green (GC skew+) and negative values in pink (GC skew-).
